# Supplementary material
Source: PubMed Central journal article supplement (PMC4537778)
Supplement: NIHMS543499-supplement-supplement_1.pdf [file NIHMS543499-supplement-supplement_1.pdf]

**Supplemental Figure.** CtBP1 over-expression suppresses the *Dlx3* gene. *In situ* hybridization of *Dlx3* in the hair follicles of WT or the K5.CtBP1 mice. Scale bar: 15  $\mu$ m.

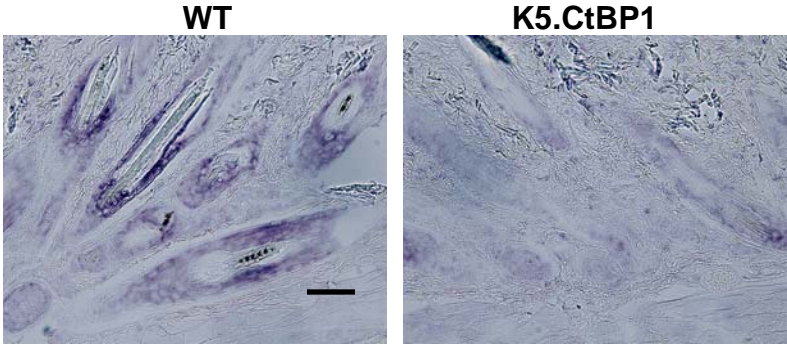

**Dlx3 in situ hybridization**
